# Supplementary material
Source: PubMed Central journal article supplement (PMC4086513)
Supplement: Supp_Data.pdf [file Supp_Data.pdf]

## Supplementary Data

### In Vivo Bone Formation by iMPCs

#### Materials and methods

Induced pluripotent stem cell (iPSC)-derived mesenchymal stem cell (MSC)-like progenitor cells (iMPCs) ( $1 \times 10^6$  M-iMPC-GMs in  $10 \mu\text{L}$ ) were implanted with  $90 \mu\text{L}$  collagen type I carrier with  $1 \mu\text{g}$  recombinant human bone morphogenetic protein-2, BMP-2 into the left thigh muscle of 2- to 3-month-old NOD CB17-Prkdc<sup>scid</sup>/J mice according to an IACUC approved protocol. As control, a similar implant without BMP-2 was made in the right thigh. The implant site was monitored by micro-computed tomography (micro-CT) for approximately 6 weeks postimplantation, after which the thigh muscle was harvested and examined histologically by H&E, Alizarin Red, and Masson's Trichrome staining.

#### Results

Bone formation was first observed only in the BMP-2-treated iMPC implant by micro-CT at week 2 postimplantation, and continued for approximately week 6 (Supplementary Fig. S7A). Mean bone density remained fairly constant from week 2 to 6 ( $318\text{--}339 \text{ mg hydroxyapatite}/\text{cm}^3$ ), although bone volume decreased from  $0.28$  to  $0.09 \text{ mm}^3$  during the same period, suggesting tissue turnover and resorption. The presence of mineralized matrix was observed by histological staining (Supplementary Fig. S7B). In contrast, neither untreated iMPCs nor BMP-2 alone induced ectopic bone formation (Supplementary Fig. S7C).

#### Conclusions

iMPCs were capable of BMP-2-induced osteogenesis on ectopic transplantation, and are, thus, MSC like. As anticipated, BMP-2 alone did not induce bone formation in this specific model, which is due to low retention at the implantation site.

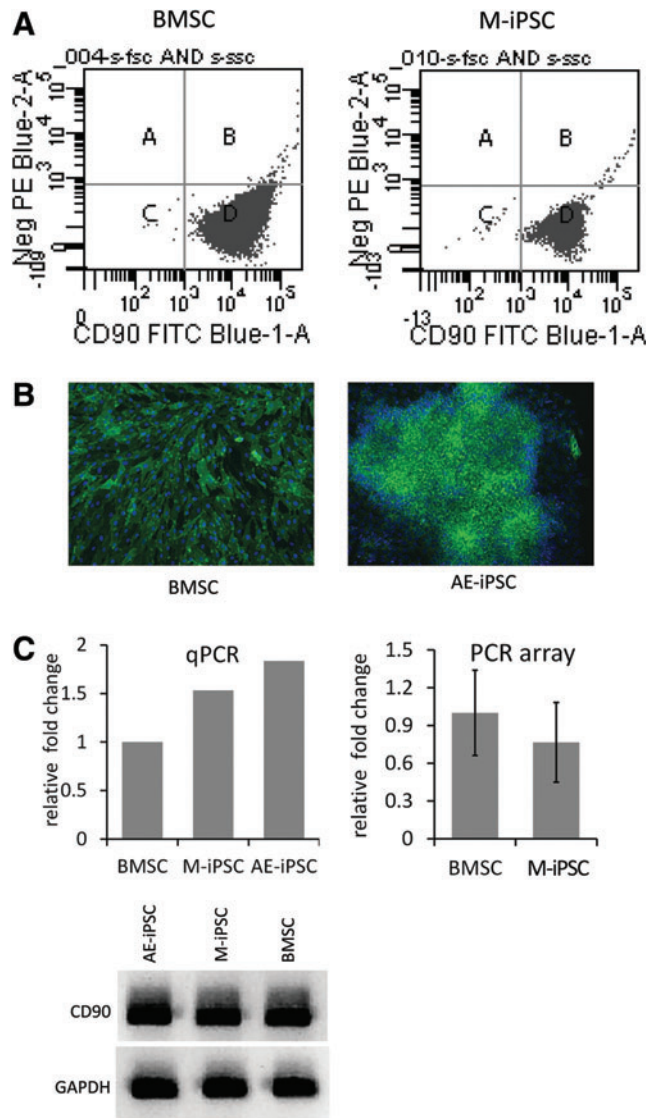

**SUPPLEMENTARY FIG. S1.** CD90 is expressed in BMSCs and iMPCs. (A) Flow cytometric analysis of CD90 in BMSCs (left) and M-iPSCs (right). (B) Immunofluorescence staining of CD90 (green) and DAPI counterstain (blue) in BMSCs (left) and AE-iPSCs (right). (C) qPCR analysis of CD90 expression in BMSCs, M-iPSCs, and AE-iPSCs (upper left) and agarose gel bands of qPCR products (bottom). CD90 expression in BMSCs and M-iPSCs according to qPCR array (right). qPCR, quantitative polymerase chain reaction.

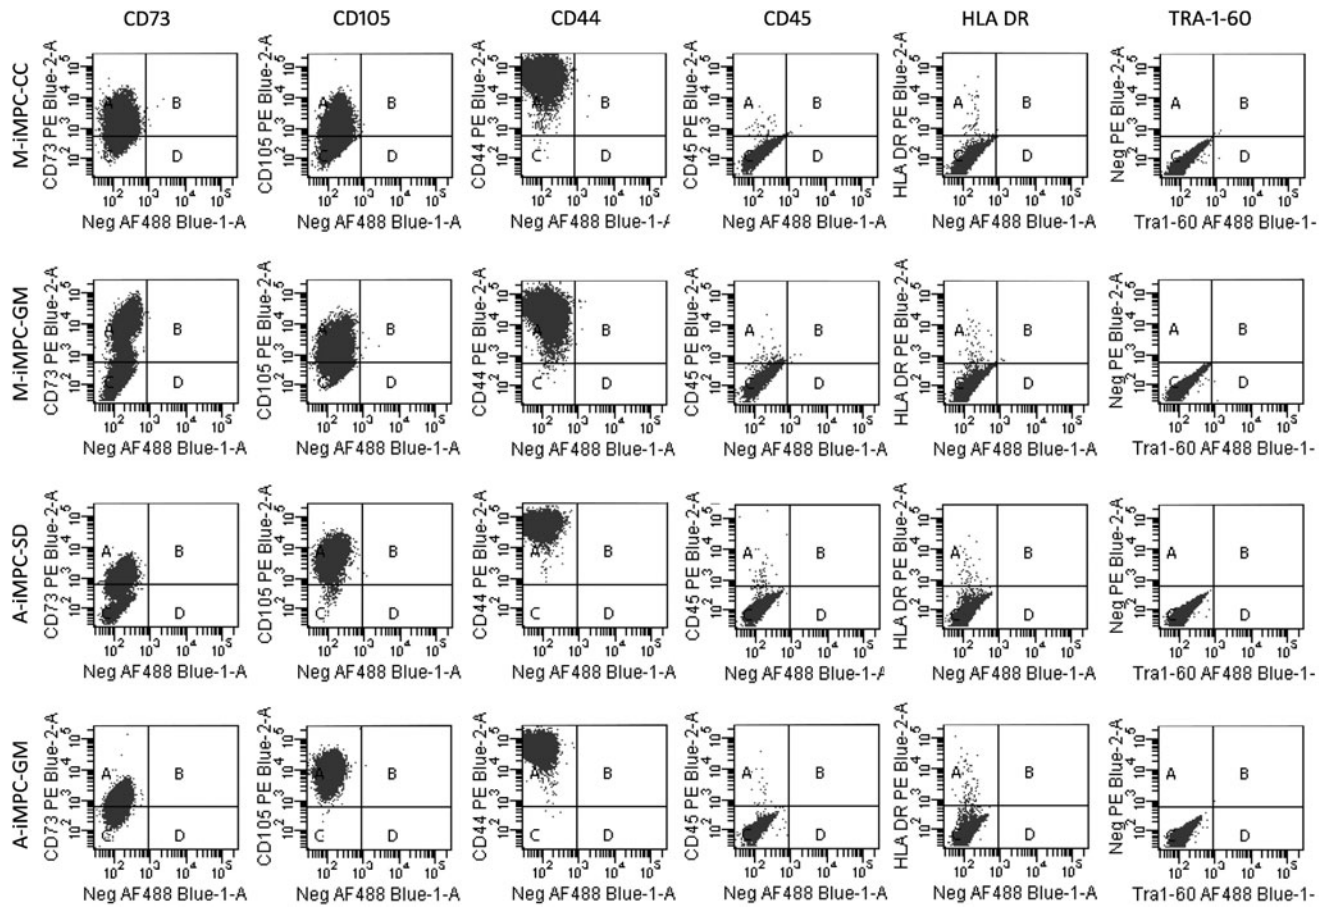

**SUPPLEMENTARY FIG. S2.** Flow cytometric analysis of surface marker expression in M-iMPC-CCs, M-iMPC-GMs, A-iMPC-SDs, and A-iMPC-GMs. Assessed surface markers included those typically present on BMSCs (CD73, CD105, and CD44), typically absent on BMSCs (CD45, HLA DR), and associated with pluripotency (TRA-1-60). Analysis of iMPC surface markers was performed with pools of four to six replicate cell lines. BMSCs, bone marrow stromal cells; CC, coculture; EB, embryoid body; GM, growth medium; iMPC, induced pluripotent stem cell (iPSC)-derived mesenchymal stem cell (MSC)-like progenitor cells; SD, spontaneous differentiation.

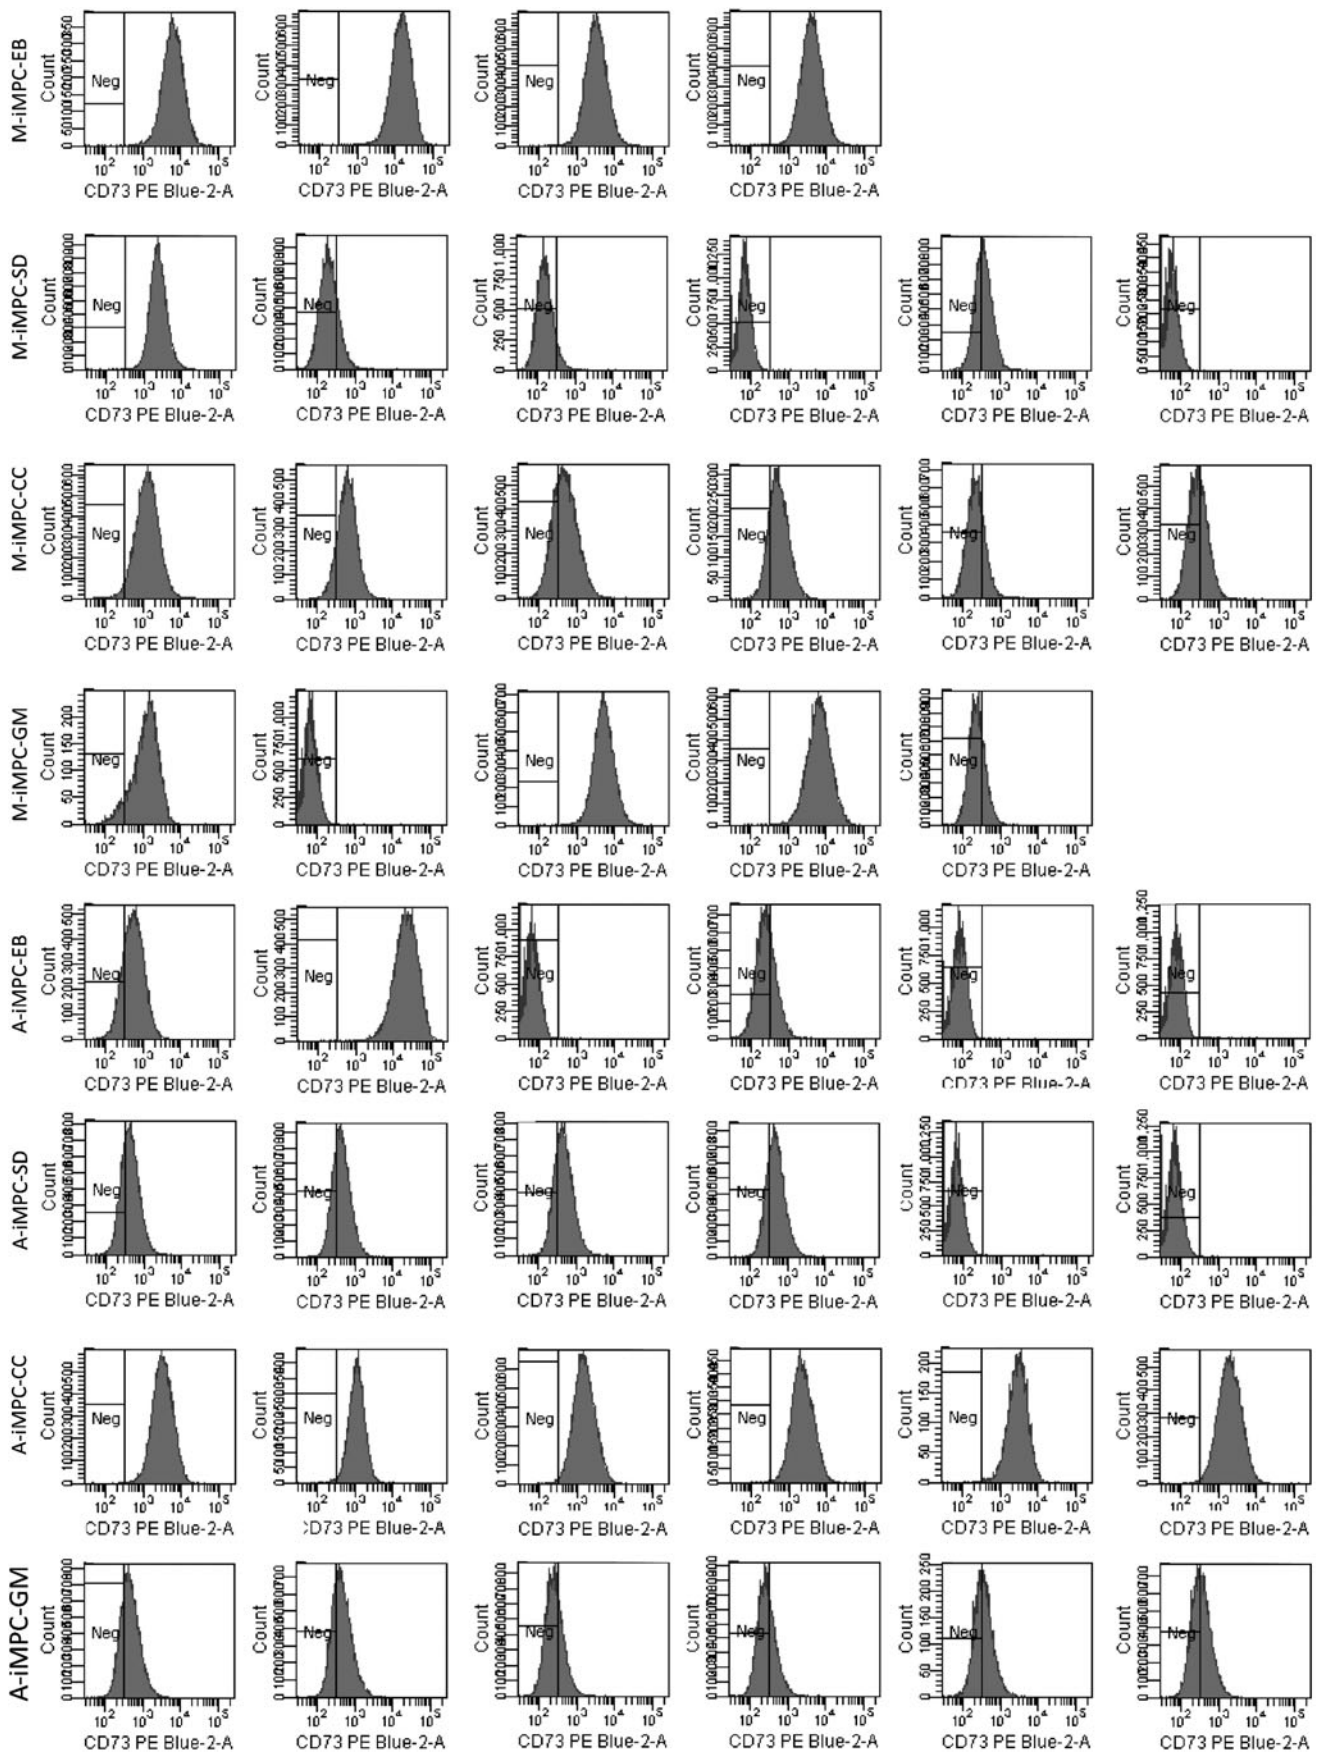

**SUPPLEMENTARY FIG. S3.** Flow cytometric analysis of CD73 expression in individual iMPC lines derived from M-iPSCs and AE-iPSCs as indicated. Four to six replicate cell lines were analyzed for each derivation method. CD73 expression was homogeneous within each cell line but deviated between replicate cell lines.

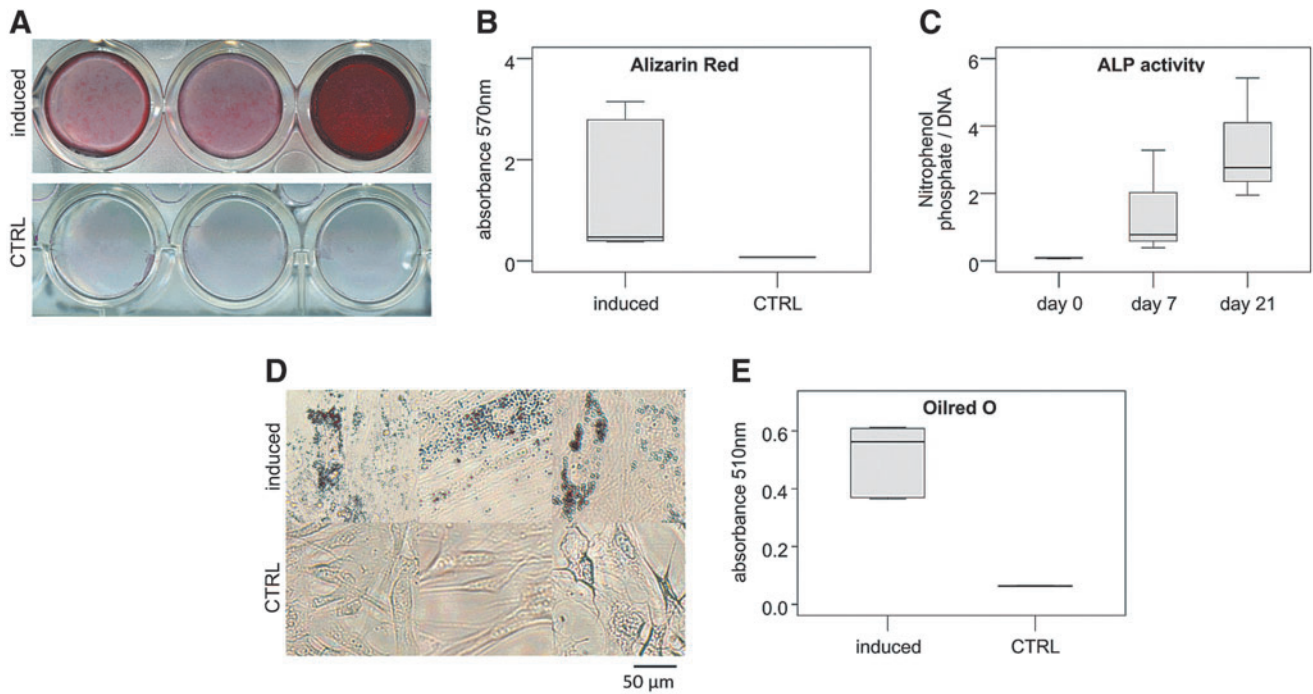

**SUPPLEMENTARY FIG. S4.** In vitro osteogenesis (A–C) and adipogenesis (D, E) of A-iMPCs in a preliminary experiment. In osteogenic medium, Alizarin Red staining (A, B) verified matrix mineralization in induced samples but not in non-induced controls. ALP activity (C) was negative on day 0 and strongly induced on days 7 and 21. In adipogenic medium (D, E), Oil Red O staining verified production of lipid droplets in induced samples but not in non-induced controls. iMPCs, induced pluripotent stem cell-derived MSC-like progenitor cells. ALP, alkaline phosphatase.

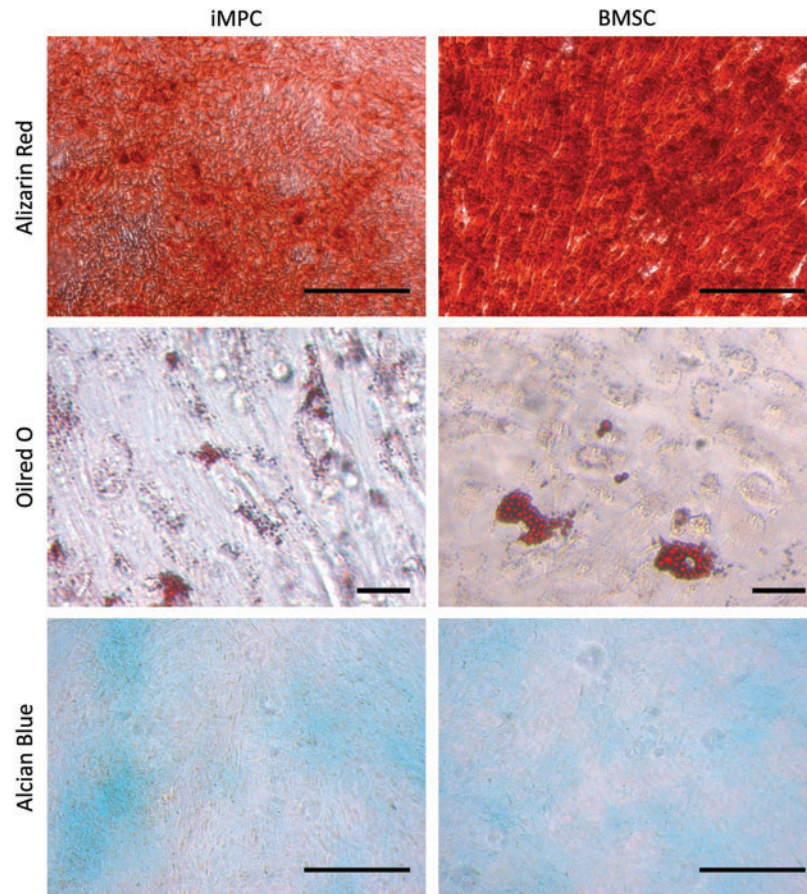

**SUPPLEMENTARY FIG. S5.** Trilineage differentiation capacity of iMPCs. One M-iMPC-GM cell line (*left*) and BMSCs (*right*) were induced to undergo osteogenesis (*top*), adipogenesis (*middle*), and chondrogenesis (*bottom*) in monolayer culture. Alizarin Red staining indicates matrix mineralization, Oil Red O, formation of lipid vesicles, and Alcian blue, deposition of sulfated glycosaminoglycans. Scale bars represent 200  $\mu\text{m}$ .

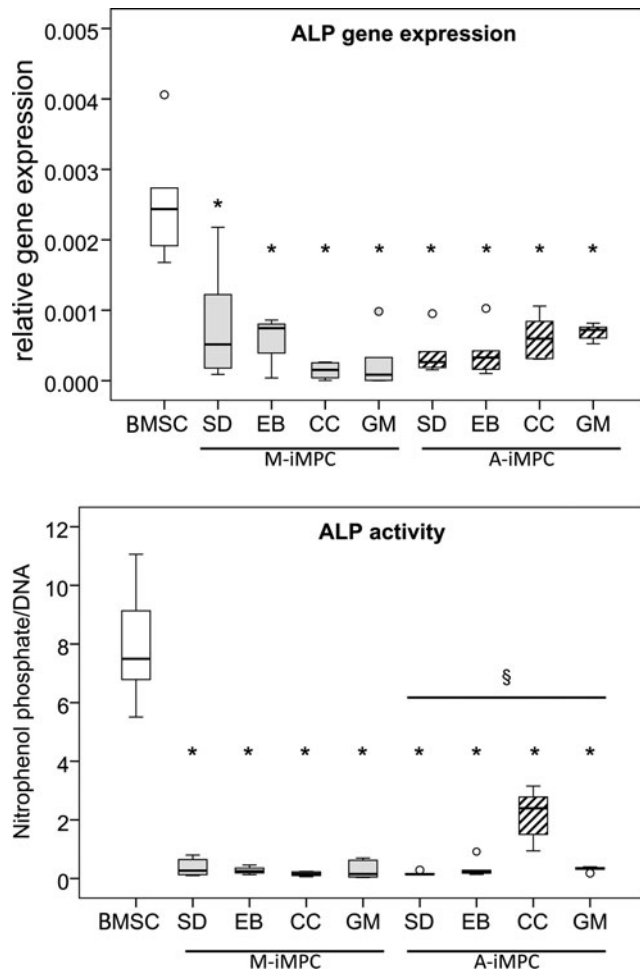

**SUPPLEMENTARY FIG. S6.** ALP gene expression on day 21 of osteogenic induction (*top*) and enzyme activity on day 7 (*bottom*) in BMSCs versus iMPCs. Values are median (*bars*), with the boxes representing first and third quartile and whiskers representing maximal and minimal values. Outliers are depicted as *circles*. Group sizes were  $n=3$  for BMSCs (independent replicates from one donor) and  $n=4-6$  for iMPCs (replicate cell lines). Significant differences ( $p<0.05$ ) between iMPCs and BMSCs are designated by an *asterisk*. Significant differences ( $p<0.05$ ) between M-iMPCs and A-iMPCs are designated by §.

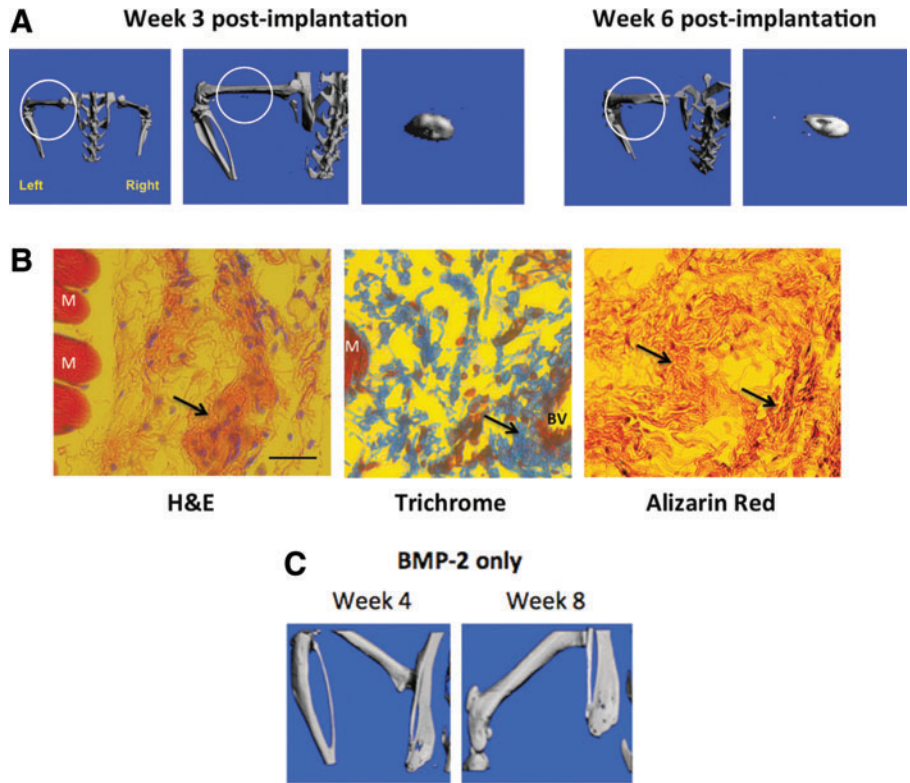

**SUPPLEMENTARY FIG. S7.** In vivo BMP-2-induced bone formation by iMPCs. **(A)** Micro-computed tomography imaging. Weeks 3 and 6 images shown (*circled*). **(B)** Histological staining of week 6 implants. (*Left*) H&E, (*middle*) Trichrome, and (*right*) Alizarin Red, showing evidence of matrix deposition and mineralization (*arrows*). BV, blood vessel; M, muscle. Scale bar = 20  $\mu$ m. **(C)** BMP-2 alone did not induce ectopic bone formation.

SUPPLEMENTARY TABLE S1. COMPARATIVE ANALYSIS OF GENE EXPRESSION PROFILES OF IMPCs VERSUS MSCs

| <i>iMPC-EB vs. BMSC</i> |          | <i>iMPC-SD vs. BMSC</i> |          | <i>iMPC-CC vs. BMSC</i> |          | <i>iMPC-GM vs. BMSC</i> |          |
|-------------------------|----------|-------------------------|----------|-------------------------|----------|-------------------------|----------|
| Gene                    | P value  | Fold regulation         | P value  | Fold regulation         | P value  | Fold regulation         | P value  |
| BDNF                    | 0.001338 | 10.814                  | 0.038336 | BDNF                    | 0.037362 | GDF15                   | 0.034147 |
| CSE3                    | 0.030983 | 4.813                   | 0.018162 | CSF2                    | 0.000007 | ICAM1                   | 0.021091 |
| GDF15                   | 0.016135 | 9.7491                  | 0.021804 | EGF                     | 0.000031 | ITGA6                   | 0.003938 |
| ICAM1                   | 0.007193 | 27.1627                 | 0.007347 | ITGA6                   | 0.000213 | MCAM                    | 0.006948 |
| MCAM                    | 0.040093 | 5.1584                  | 0.001829 | KDR                     | 0.014242 | NES                     | 0.032144 |
| NES                     | 0.002814 | 8.786                   | 0.005147 | MCAM                    | 0.000002 | <b>SOX2</b>             | 0.002529 |
| NOTCH1                  | 0.006026 | 7.0927                  | 0.014924 | NES                     | 0.026494 | <b>ANPEP</b>            | 0.00125  |
| POU5F1                  | 0.014796 | 17.8667                 | 0.011637 | SMURF2                  | 0.003189 | <b>BGLAP</b>            | 0.005226 |
| PPARG                   | 0.046799 | 17.5012                 | 0.006716 | <b>SOX2</b>             | 0.000021 | ENG                     | 0.002128 |
| PTK2                    | 0.025064 | 4.2113                  | 0.006999 | <b>ANPEP</b>            | 0.006999 |                         |          |
| SMURF2                  | 0.017529 | 4.7024                  | 0.005277 | <b>BGLAP</b>            | 0.005277 |                         |          |
| <b>SOX2</b>             | 0.006629 | 39.0144                 | 0.015443 | COL1A1                  | 0.015443 |                         |          |
| <b>ANPEP</b>            | 0.001796 | -4.1935                 | 0.000785 | ENG                     | 0.000785 |                         |          |
| <b>BGLAP</b>            | 0.005967 | -6.9754                 | 0.023201 | GDF5                    | 0.023201 |                         |          |
| BMP4                    | 0.020994 | -15.3303                | 0.001764 | HGF                     | 0.001764 |                         |          |
| GDF5                    | 0.032527 | -15.167                 | 0.001497 | MMP2                    | 0.001497 |                         |          |
| THY1                    | 0.035722 | -5.0549                 | 0.017613 | TGFB3                   | 0.017613 |                         |          |
| VCAM1                   | 0.019326 | -5.1962                 | 0.005701 | VCAM1                   | 0.005701 |                         |          |

Recurring genes are printed in *bold*, up-regulation is marked *red*, and down-regulated genes are printed *green*.

CC, coculture; EB, embryoid body; GM, growth medium; iMPC, induced pluripotent stem cell (iPSC)-derived mesenchymal stem cell (MSC)-like progenitor cells; SD, spontaneous differentiation.
